# Supplementary material
Source: PubMed Central journal article supplement (PMC2903371)
Supplement: supp_M110.132027_jbc.M110.132027-1.pdf [file supp_M110.132027_jbc.M110.132027-1.pdf]

**Expression from p235**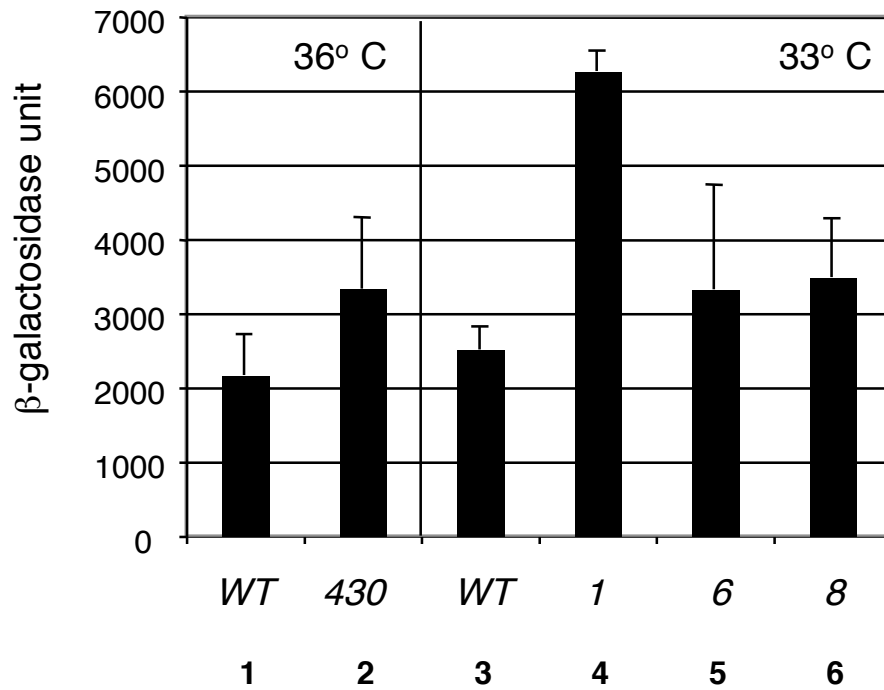

**Fig. S1. Effect of *tif4632* mutations on *GCN4-lacZ* expression from p235.** Transformants of YAS1955 (WT) or its *tif4632* derivatives (Table 1) carrying p235 were grown at indicated temperatures and assayed for  $\beta$ -galactosidase. This graph indicates average values of the  $\beta$ -gal. activity units with bars denoting SD.
